# Supplementary material for: Re-development of mental health first aid guidelines for suicidal ideation and behaviour: a Delphi study
Source: PubMed Central journal article supplement (PMC4199061; doi:10.1186/s12888-014-0241-8), 2014-09-13
Supplement: 12888_2014_241_MOESM2_ESM.pdf [file 12888_2014_241_MOESM2_ESM.pdf]

# Redevelopment of mental health first aid guidelines for suicidal thoughts

## Introduction

### Purpose of the research

The aim of this project is to re-develop guidelines for members of the public providing first aid for people who are having suicidal thoughts or displaying suicidal behaviour. This redevelopment will ensure the guidelines remain consistent with the current literature and contain the most recent and appropriate helping actions, as well as continue to meet the standards for their inclusion on the NHMRC Clinical Practice Guidelines Portal.

As a first step, we are seeking to find current consensus on the key skills and knowledge that a person needs to help someone who is having suicidal thoughts or displaying suicidal behaviour. The statements from this questionnaire that receive a high level of consensus will be included in the mental health first aid guidelines for suicidal thoughts. The guidelines will then be used as the basis for an intervention training program.

### Your role

You have been selected as a panel member for this study because you have expertise in the area of suicide prevention. Your task is to rate the statements presented in this questionnaire according to how important you believe they are to the aims of mental health first aid and the role of the first aider.

**The role of a Mental Health First Aider is to help a person who is developing a mental health problem or is in a mental health crisis. The first aid is given until appropriate professional treatment is received or the crisis resolves.**

### How this questionnaire was developed

1. Items that appeared in Round 1 and are presented again in Round 2 for re-rating because they received a level of consensus that was neither high enough to be clearly endorsed nor low enough to be clearly rejected.
2. Items that appear for the first time in Round 2 which have been developed from comments made by panel members in Round 1(**denoted by an \***).

It is important to note that we do not necessarily agree with these statements; we have included them because we do not believe that we should decide what the best practice is for mental health first aid. Rather, we have invited you to be a member of the expert panel to help develop a set of guidelines that reflect current expert opinion across the field of suicide prevention.

### Other instructions to note

This questionnaire should take approximately **15-20 minutes** to complete. However, some people may finish it much more quickly. Others may take more time. Please be aware that once you have logged on and started responding, you may save your answers at any time by completing a page and clicking "Next" at the bottom. This marks your page as complete and you may begin again another time at the next page. Please make sure that you always log back in using the same email link, otherwise the software will fail to recognise your code and previously saved

# Redevelopment of mental health first aid guidelines for suicidal thoughts

responses.

We would like to **thank you** for your time and effort and encourage you to provide us with feedback on this process.

Best wishes,

The Research Team  
Population Mental Health Group  
Melbourne School of Population and Global Health  
University of Melbourne

## Definitions of terms used in this questionnaire

Throughout the questionnaire, we use the terms **'the person'** to refer to the person experiencing suicidal thoughts or engaging in non-suicidal self-injury, and **'the first aider'** to refer to the person providing assistance.

**Mental health problem** is a broad term that includes developing mental illness, symptoms of a diagnosable illness, substance use, and adverse life events which are having an impact on functioning. A **mental illness** is a mental health problem that has been diagnosed by a mental health professional, that affects a person's thinking, emotional state and behaviour, and disrupts a person's ability to work or carry out other daily activities and engage in satisfying personal relationships.

**Emergency services** refers to the best services available at short notice for the situation in the area. **Emergency mental health services** refers to mental health services that are available at short notice in the area, and could include a crisis team or a suicide helpline.

A **Safety plan** is an agreement between the suicidal person and the first aider that involves actions to keep the suicidal person safe.

Please be aware that the statements in this survey only apply to first aid given by adults. However, there are some statements specifically about the support that an adult could provide to an adolescent. These items are included in cases where the support provided to an adolescent might be quite different to the support provided to an adult. The term **adolescent** refers to a young person aged between 12 and 18 years (nominally the high school years).

## Overview of suicide questionnaire content

Please note that there will be an opportunity to add any **comments or suggestions** you might have at the **end of each section** of the survey.

### Section 1- Identification of suicide risk

- *Things to consider before making an approach*
- *How to approach the person of concern*
- *Asking about suicidal thoughts*
- *What to do if the person of concern doesn't want to talk*
- *What to do if the first aider feels unsuccessful in their approach*

# Redevelopment of mental health first aid guidelines for suicidal thoughts

- *What to do if the person of concern is psychotic*
- *What to do if the person of concern is under the influence of drugs and alcohol*

## **Section 2- Assessing seriousness of the suicide risk**

- *Assessing the urgency of the risk*
- *Finding out about the suicidal person's plan*
- *Asking about the factors that contribute to risk*
- *Asking about other factors that contribute to risk*

## **Section 3- Initial assistance**

- *Providing initial assistance to the suicidal person*

## **Section 4- Talking with the suicidal person**

- *What to do when talking with the suicidal person*
- *Things to avoid when talking with the suicidal person*

## **Section 5- No-suicide contracts**

- *Developing a safety plan*
- *What the safety plan should include*
- *Timeframe of the safety plan*
- *When to make a safety plan*

## **Section 6- Ensuring safety**

- *Reducing the chances of the suicidal person acting on suicidal thoughts*

## **Section 7- Passing time during the crisis**

- *What to do until the suicide crisis passes*

## **Section 8- What the first aider should know**

- *The facts about suicide*
- *The preventable nature of suicide*

## **Section 9- Confidentiality**

- *Determining what information needs to be shared with others*

## **Section 10- Adolescent specific**

- *Helping statements that may differ in endorsement for people aged 12-18 compared to adults*

## **Section 1. Identification of suicide risk**

This section contains statements about identifying the severity of the person's risk of suicide.

**NOTE: If the person has already acted on their thoughts of suicide, this should be treated as a medical emergency.**

Please rate how important (from *essential* to *should not be included*) you think it is that each statement be included in the final guidelines.

Please note that there will be an opportunity to add any **comments or suggestions** you might have at the **end of each section** of the survey.

# Redevelopment of mental health first aid guidelines for suicidal thoughts

## *Before approaching the person*

**4. If the suicidal person has already harmed themselves, the first aider should administer first aid and call emergency services, asking for an ambulance.**

| Essential             | Important             | Don't know/Depends    | Unimportant           | Should not be included |
|-----------------------|-----------------------|-----------------------|-----------------------|------------------------|
| <input type="radio"/> | <input type="radio"/> | <input type="radio"/> | <input type="radio"/> | <input type="radio"/>  |

**8. The first aider should choose a private place to talk the person about their concerns.**

| Essential             | Important             | Don't know/Depends    | Unimportant           | Should not be included |
|-----------------------|-----------------------|-----------------------|-----------------------|------------------------|
| <input type="radio"/> | <input type="radio"/> | <input type="radio"/> | <input type="radio"/> | <input type="radio"/>  |

## *How to make the approach*

**The first aider should:**

|                                                                                                                           | Essential             | Important             | Don't know/Depends    | Unimportant           | Should not be included |
|---------------------------------------------------------------------------------------------------------------------------|-----------------------|-----------------------|-----------------------|-----------------------|------------------------|
| 10. Tell the person their concerns about them, describing behaviours that have caused them to be concerned about suicide. | <input type="radio"/> | <input type="radio"/> | <input type="radio"/> | <input type="radio"/> | <input type="radio"/>  |
| 13. Demonstrate appropriate language when referring to suicide by using the terms 'suicide' or 'died by suicide'.         | <input type="radio"/> | <input type="radio"/> | <input type="radio"/> | <input type="radio"/> | <input type="radio"/>  |

## *Asking about suicidal thoughts*

**18. The first aider should ask the person about suicidal thoughts, even if the first aider feels uncomfortable doing so.**

| Essential             | Important             | Don't know/Depends    | Unimportant           | Should not be included |
|-----------------------|-----------------------|-----------------------|-----------------------|------------------------|
| <input type="radio"/> | <input type="radio"/> | <input type="radio"/> | <input type="radio"/> | <input type="radio"/>  |

**\*22.1. The first aider should not ask about suicide in leading or judgemental ways e.g. 'You're not thinking of doing anything stupid, are you?'**

| Essential             | Important             | Don't know/Depends    | Unimportant           | Should not be included |
|-----------------------|-----------------------|-----------------------|-----------------------|------------------------|
| <input type="radio"/> | <input type="radio"/> | <input type="radio"/> | <input type="radio"/> | <input type="radio"/>  |

**The first aider should be aware that:**

|                                                                                            | Essential             | Important             | Don't know/Depends    | Unimportant           | Should not be included |
|--------------------------------------------------------------------------------------------|-----------------------|-----------------------|-----------------------|-----------------------|------------------------|
| 23. If a person is not suicidal, asking them cannot put the idea of suicide in their head. | <input type="radio"/> | <input type="radio"/> | <input type="radio"/> | <input type="radio"/> | <input type="radio"/>  |

# Redevelopment of mental health first aid guidelines for suicidal thoughts

*If the person doesn't want to talk*

**31. If the first aider thinks the person is uncomfortable interacting with them due to differences in age group or gender, they should ask the person if they would prefer to talk to someone of the same age group or gender.**

| Essential             | Important             | Don't know/Depends    | Unimportant           | Should not be included |
|-----------------------|-----------------------|-----------------------|-----------------------|------------------------|
| <input type="radio"/> | <input type="radio"/> | <input type="radio"/> | <input type="radio"/> | <input type="radio"/>  |

**32. If the first aider thinks the person is uncomfortable interacting with them due to differences in cultural background, they should ask the person if they would prefer to talk to someone of the same cultural background.**

| Essential             | Important             | Don't know/Depends    | Unimportant           | Should not be included |
|-----------------------|-----------------------|-----------------------|-----------------------|------------------------|
| <input type="radio"/> | <input type="radio"/> | <input type="radio"/> | <input type="radio"/> | <input type="radio"/>  |

**\*32.1. The first aider should be aware that it is more important to genuinely want to help than to be of the same age, gender or cultural background as the person.**

| Essential             | Important             | Don't know/Depends    | Unimportant           | Should not be included |
|-----------------------|-----------------------|-----------------------|-----------------------|------------------------|
| <input type="radio"/> | <input type="radio"/> | <input type="radio"/> | <input type="radio"/> | <input type="radio"/>  |

## Section 1. Identification of suicide risk continued (2)

*Reacting to expressions of suicidal thoughts*

**The first aider should:**

|                                                                                               | Essential             | Important             | Don't know/Depends    | Unimportant           | Should not be included |
|-----------------------------------------------------------------------------------------------|-----------------------|-----------------------|-----------------------|-----------------------|------------------------|
| 36. Know that it is common to feel panic or shock when someone discloses thoughts of suicide. | <input type="radio"/> | <input type="radio"/> | <input type="radio"/> | <input type="radio"/> | <input type="radio"/>  |
| 40. Respect the suicidal person and not try to take charge of the situation.                  | <input type="radio"/> | <input type="radio"/> | <input type="radio"/> | <input type="radio"/> | <input type="radio"/>  |

**43. If the person is at a point of despair, the first aider needs to take control and be directive in ensuring their safety.**

| Essential             | Important             | Don't know/Depends    | Unimportant           | Should not be included |
|-----------------------|-----------------------|-----------------------|-----------------------|------------------------|
| <input type="radio"/> | <input type="radio"/> | <input type="radio"/> | <input type="radio"/> | <input type="radio"/>  |

# Redevelopment of mental health first aid guidelines for suicidal thoughts

*If the person is experiencing an episode of psychosis*

**\*44.1. The first aider should tell the person that suicidal thoughts are temporary and will reduce over time.**

| Essential             | Important             | Don't know/Depends    | Unimportant           | Should not be included |
|-----------------------|-----------------------|-----------------------|-----------------------|------------------------|
| <input type="radio"/> | <input type="radio"/> | <input type="radio"/> | <input type="radio"/> | <input type="radio"/>  |

**\*44.2. The first aider should tell the person that they won't feel this badly forever.**

| Essential             | Important             | Don't know/Depends    | Unimportant           | Should not be included |
|-----------------------|-----------------------|-----------------------|-----------------------|------------------------|
| <input type="radio"/> | <input type="radio"/> | <input type="radio"/> | <input type="radio"/> | <input type="radio"/>  |

**\*46.1. If the suicidal person says they are hearing voices, the first aider should ask what the voices are telling the person in case the voices are relevant to their current suicidal thoughts.**

| Essential             | Important             | Don't know/Depends    | Unimportant           | Should not be included |
|-----------------------|-----------------------|-----------------------|-----------------------|------------------------|
| <input type="radio"/> | <input type="radio"/> | <input type="radio"/> | <input type="radio"/> | <input type="radio"/>  |

## Section 2. Assessing seriousness of the suicide risk

This section contains statements about accessing the seriousness of the person's risk of suicide.

Please rate how important (from *essential* to *should not be included*) you think it is that each statement be included in the final guidelines.

### ***Assessing the urgency of suicide risk***

**49. The first aider should determine the urgency of taking action based on recognition of suicide warning signs.**

| Essential             | Important             | Don't know/Depends    | Unimportant           | Should not be included |
|-----------------------|-----------------------|-----------------------|-----------------------|------------------------|
| <input type="radio"/> | <input type="radio"/> | <input type="radio"/> | <input type="radio"/> | <input type="radio"/>  |

**52. The first aider should establish whether the person has definite plans and intentions to take their life as opposed to vague suicidal notions such as "what's the point?" or "I can't be bothered going on".**

| Essential             | Important             | Don't know/Depends    | Unimportant           | Should not be included |
|-----------------------|-----------------------|-----------------------|-----------------------|------------------------|
| <input type="radio"/> | <input type="radio"/> | <input type="radio"/> | <input type="radio"/> | <input type="radio"/>  |

# Redevelopment of mental health first aid guidelines for suicidal thoughts

## Finding out about a suicide plan

### The first aider should:

|                                                                                                                                         | Essential             | Important             | Don't know/Depends    | Unimportant           | Should not be included |
|-----------------------------------------------------------------------------------------------------------------------------------------|-----------------------|-----------------------|-----------------------|-----------------------|------------------------|
| 56. Ask the suicidal person how they intend to suicide i.e. ask them direct questions about how, when and where they intend to suicide. | <input type="radio"/> | <input type="radio"/> | <input type="radio"/> | <input type="radio"/> | <input type="radio"/>  |

## Asking about other factors that contribute to risk

### The first aider should ask the suicidal person:

|                                                                                          | Essential             | Important             | Don't know/Depends    | Unimportant           | Should not be included |
|------------------------------------------------------------------------------------------|-----------------------|-----------------------|-----------------------|-----------------------|------------------------|
| 63. If they have received mental health treatment in the past.                           | <input type="radio"/> | <input type="radio"/> | <input type="radio"/> | <input type="radio"/> | <input type="radio"/>  |
| *63.1. If they have ever received help from a mental health professional.                | <input type="radio"/> | <input type="radio"/> | <input type="radio"/> | <input type="radio"/> | <input type="radio"/>  |
| *63.2. If they have a serious physical illness or if they are experiencing chronic pain. | <input type="radio"/> | <input type="radio"/> | <input type="radio"/> | <input type="radio"/> | <input type="radio"/>  |
| *64.1. If anyone who they felt close to has made a suicide attempt.                      | <input type="radio"/> | <input type="radio"/> | <input type="radio"/> | <input type="radio"/> | <input type="radio"/>  |
| *64.2. If anyone who they felt close to has died by suicide.                             | <input type="radio"/> | <input type="radio"/> | <input type="radio"/> | <input type="radio"/> | <input type="radio"/>  |
| 66. If they have ever made a suicide plan in the past.                                   | <input type="radio"/> | <input type="radio"/> | <input type="radio"/> | <input type="radio"/> | <input type="radio"/>  |
| 70. How things are at home and work/school.                                              | <input type="radio"/> | <input type="radio"/> | <input type="radio"/> | <input type="radio"/> | <input type="radio"/>  |
| 71. If there have been changes in their employment, social life, or family.              | <input type="radio"/> | <input type="radio"/> | <input type="radio"/> | <input type="radio"/> | <input type="radio"/>  |
| *71.1. Whether the person has major debts (e.g. gambling losses).                        | <input type="radio"/> | <input type="radio"/> | <input type="radio"/> | <input type="radio"/> | <input type="radio"/>  |

### \*63.3. If the person has been helped by a mental health professional in the past, the first aider should encourage them to reconnect with that person.

| Essential             | Important             | Don't know/Depends    | Unimportant           | Should not be included |
|-----------------------|-----------------------|-----------------------|-----------------------|------------------------|
| <input type="radio"/> | <input type="radio"/> | <input type="radio"/> | <input type="radio"/> | <input type="radio"/>  |

## Section 3. Initial assistance

This section contains statements about the assistance to be first provided to the person.

Please rate how important (from *essential* to *should not be included*) you think it is that each statement be included in the final guidelines.

### 75. The first aider should not put themselves in any danger while offering support to the suicidal person.

| Essential             | Important             | Don't know/Depends    | Unimportant           | Should not be included |
|-----------------------|-----------------------|-----------------------|-----------------------|------------------------|
| <input type="radio"/> | <input type="radio"/> | <input type="radio"/> | <input type="radio"/> | <input type="radio"/>  |

# Redevelopment of mental health first aid guidelines for suicidal thoughts

## 76. The first aider should not leave someone who is feeling suicidal on their own.

| Essential             | Important             | Don't know/Depends    | Unimportant           | Should not be included |
|-----------------------|-----------------------|-----------------------|-----------------------|------------------------|
| <input type="radio"/> | <input type="radio"/> | <input type="radio"/> | <input type="radio"/> | <input type="radio"/>  |

## 81. If the person is suicidal, the first aider should:

|                                                                             | Essential             | Important             | Don't know/Depends    | Unimportant           | Should not be included |
|-----------------------------------------------------------------------------|-----------------------|-----------------------|-----------------------|-----------------------|------------------------|
| Discuss with the suicidal person what actions they should take to get help. | <input type="radio"/> | <input type="radio"/> | <input type="radio"/> | <input type="radio"/> | <input type="radio"/>  |

## 82. If the suicidal person can't commit to stay safe, the first aider should:

|                                                                                                                                                                       | Essential             | Important             | Don't know/Depends    | Unimportant           | Should not be included |
|-----------------------------------------------------------------------------------------------------------------------------------------------------------------------|-----------------------|-----------------------|-----------------------|-----------------------|------------------------|
| Encourage the suicidal person to get appropriate professional help as soon as possible (i.e. See a mental health professional or someone at a mental health service). | <input type="radio"/> | <input type="radio"/> | <input type="radio"/> | <input type="radio"/> | <input type="radio"/>  |
| Seek the permission of the suicidal person to contact their regular doctor or mental health professional about their concerns.                                        | <input type="radio"/> | <input type="radio"/> | <input type="radio"/> | <input type="radio"/> | <input type="radio"/>  |
| Call a mental health centre or crisis telephone line and ask for advice on the situation.                                                                             | <input type="radio"/> | <input type="radio"/> | <input type="radio"/> | <input type="radio"/> | <input type="radio"/>  |

## 83. If the suicidal person has a specific plan, the first aider should:

|                                                                                           | Essential             | Important             | Don't know/Depends    | Unimportant           | Should not be included |
|-------------------------------------------------------------------------------------------|-----------------------|-----------------------|-----------------------|-----------------------|------------------------|
| Call a mental health centre or crisis telephone line and ask for advice on the situation. | <input type="radio"/> | <input type="radio"/> | <input type="radio"/> | <input type="radio"/> | <input type="radio"/>  |

## 84. If the suicidal person has the means to carry out their suicide plan, the first aider should:

|                                                                                                                                                                       | Essential             | Important             | Don't know/Depends    | Unimportant           | Should not be included |
|-----------------------------------------------------------------------------------------------------------------------------------------------------------------------|-----------------------|-----------------------|-----------------------|-----------------------|------------------------|
| Encourage the suicidal person to get appropriate professional help as soon as possible (i.e. See a mental health professional or someone at a mental health service). | <input type="radio"/> | <input type="radio"/> | <input type="radio"/> | <input type="radio"/> | <input type="radio"/>  |
| Seek the permission of the suicidal person to contact their regular doctor or mental health professional about their concerns.                                        | <input type="radio"/> | <input type="radio"/> | <input type="radio"/> | <input type="radio"/> | <input type="radio"/>  |
| Call a mental health centre or crisis telephone line and ask for advice on the situation.                                                                             | <input type="radio"/> | <input type="radio"/> | <input type="radio"/> | <input type="radio"/> | <input type="radio"/>  |



# Redevelopment of mental health first aid guidelines for suicidal thoughts

## 85. If the suicidal person does not agree to give the first aider the things they intend using to kill themselves, the first aider should:

|                                                                                                                                                                       | Essential             | Important             | Don't know/Depends    | Unimportant           | Should not be included |
|-----------------------------------------------------------------------------------------------------------------------------------------------------------------------|-----------------------|-----------------------|-----------------------|-----------------------|------------------------|
| Discuss with the suicidal person what actions they should take to get help.                                                                                           | <input type="radio"/> | <input type="radio"/> | <input type="radio"/> | <input type="radio"/> | <input type="radio"/>  |
| Encourage the suicidal person to get appropriate professional help as soon as possible (i.e. See a mental health professional or someone at a mental health service). | <input type="radio"/> | <input type="radio"/> | <input type="radio"/> | <input type="radio"/> | <input type="radio"/>  |
| Seek the permission of the suicidal person to contact their regular doctor or mental health professional about their concerns.                                        | <input type="radio"/> | <input type="radio"/> | <input type="radio"/> | <input type="radio"/> | <input type="radio"/>  |
| Call a mental health centre or crisis telephone line and ask for advice on the situation.                                                                             | <input type="radio"/> | <input type="radio"/> | <input type="radio"/> | <input type="radio"/> | <input type="radio"/>  |
| Call a doctor, psychiatrist or other professional right away for the suicidal person.                                                                                 | <input type="radio"/> | <input type="radio"/> | <input type="radio"/> | <input type="radio"/> | <input type="radio"/>  |
| Get the suicidal person to phone an emergency number (i.e. Emergency services, a suicide helpline, emergency mental health services).                                 | <input type="radio"/> | <input type="radio"/> | <input type="radio"/> | <input type="radio"/> | <input type="radio"/>  |
| Phone an emergency number <b>without letting the suicidal person know</b> .                                                                                           | <input type="radio"/> | <input type="radio"/> | <input type="radio"/> | <input type="radio"/> | <input type="radio"/>  |
| Take the suicidal person to a hospital emergency department.                                                                                                          | <input type="radio"/> | <input type="radio"/> | <input type="radio"/> | <input type="radio"/> | <input type="radio"/>  |

## 86. If the suicidal person has attempted suicide in the past, the first aider should:

|                                                                                           | Essential             | Important             | Don't know/Depends    | Unimportant           | Should not be included |
|-------------------------------------------------------------------------------------------|-----------------------|-----------------------|-----------------------|-----------------------|------------------------|
| Call a mental health centre or crisis telephone line and ask for advice on the situation. | <input type="radio"/> | <input type="radio"/> | <input type="radio"/> | <input type="radio"/> | <input type="radio"/>  |

## Section 3. Initial assistance (2)

## 87. If the suicidal person is known to have a diagnosis of a mental illness, the first aider should:

|                                                                                                                                | Essential             | Important             | Don't know/Depends    | Unimportant           | Should not be included |
|--------------------------------------------------------------------------------------------------------------------------------|-----------------------|-----------------------|-----------------------|-----------------------|------------------------|
| Seek the permission of the suicidal person to contact their regular doctor or mental health professional about their concerns. | <input type="radio"/> | <input type="radio"/> | <input type="radio"/> | <input type="radio"/> | <input type="radio"/>  |

## 88. If the suicidal person is psychotic, the first aider should:

|                                                                                           | Essential             | Important             | Don't know/Depends    | Unimportant           | Should not be included |
|-------------------------------------------------------------------------------------------|-----------------------|-----------------------|-----------------------|-----------------------|------------------------|
| Call a mental health centre or crisis telephone line and ask for advice on the situation. | <input type="radio"/> | <input type="radio"/> | <input type="radio"/> | <input type="radio"/> | <input type="radio"/>  |

# Redevelopment of mental health first aid guidelines for suicidal thoughts

## 89. If the suicidal person refuses professional help, the first aider should:

|                                                                                                                                                                       | Essential             | Important             | Don't know/Depends    | Unimportant           | Should not be included |
|-----------------------------------------------------------------------------------------------------------------------------------------------------------------------|-----------------------|-----------------------|-----------------------|-----------------------|------------------------|
| Encourage the suicidal person to get appropriate professional help as soon as possible (i.e. See a mental health professional or someone at a mental health service). | <input type="radio"/> | <input type="radio"/> | <input type="radio"/> | <input type="radio"/> | <input type="radio"/>  |
| Call a mental health centre or crisis telephone line and ask for advice on the situation.                                                                             | <input type="radio"/> | <input type="radio"/> | <input type="radio"/> | <input type="radio"/> | <input type="radio"/>  |

## 92. If the suicidal person is reluctant to seek help, the first aider should:

|                                                                                                                       | Essential             | Important             | Don't know/Depends    | Unimportant           | Should not be included |
|-----------------------------------------------------------------------------------------------------------------------|-----------------------|-----------------------|-----------------------|-----------------------|------------------------|
| Talk to a health professional for advice on the situation.                                                            | <input type="radio"/> | <input type="radio"/> | <input type="radio"/> | <input type="radio"/> | <input type="radio"/>  |
| Make sure someone who is close to the suicidal person is aware of the situation (i.e. close friend or family member). | <input type="radio"/> | <input type="radio"/> | <input type="radio"/> | <input type="radio"/> | <input type="radio"/>  |

## 93. If the suicidal person doesn't want to talk to someone face-to-face, the first aider should encourage them to contact a suicide helpline.

| Essential             | Important             | Don't know/Depends    | Unimportant           | Should not be included |
|-----------------------|-----------------------|-----------------------|-----------------------|------------------------|
| <input type="radio"/> | <input type="radio"/> | <input type="radio"/> | <input type="radio"/> | <input type="radio"/>  |

## 97. If the suicidal person has a weapon, the first aider should:

|                     | Essential             | Important             | Don't know/Depends    | Unimportant           | Should not be included |
|---------------------|-----------------------|-----------------------|-----------------------|-----------------------|------------------------|
| Contact the police. | <input type="radio"/> | <input type="radio"/> | <input type="radio"/> | <input type="radio"/> | <input type="radio"/>  |

## \*98.1. The first aider should exercise appropriate self-care after helping someone who is feeling suicidal.

| Essential             | Important             | Don't know/Depends    | Unimportant           | Should not be included |
|-----------------------|-----------------------|-----------------------|-----------------------|------------------------|
| <input type="radio"/> | <input type="radio"/> | <input type="radio"/> | <input type="radio"/> | <input type="radio"/>  |

## Section 4. Talking with a suicidal person

This section contains statements about talking to the suicidal person about their suicidal thoughts.

Please rate how important (from *essential* to *should not be included*) you think it is that each statement be included in the final guidelines.

### Letting them know you care

#### The first aider should:

|                                                                                              | Essential             | Important             | Don't know/Depends    | Unimportant           | Should not be included |
|----------------------------------------------------------------------------------------------|-----------------------|-----------------------|-----------------------|-----------------------|------------------------|
| 109. Keep in mind that asking too many questions can provoke anxiety in the suicidal person. | <input type="radio"/> | <input type="radio"/> | <input type="radio"/> | <input type="radio"/> | <input type="radio"/>  |

# Redevelopment of mental health first aid guidelines for suicidal thoughts

## Actively listening

### The first aider should:

|                                                                                  | Essential             | Important             | Don't know/Depends    | Unimportant           | Should not be included |
|----------------------------------------------------------------------------------|-----------------------|-----------------------|-----------------------|-----------------------|------------------------|
| 119. Share their thoughts with the suicidal person without expressing judgement. | <input type="radio"/> | <input type="radio"/> | <input type="radio"/> | <input type="radio"/> | <input type="radio"/>  |

## Reacting to suicidal thoughts

### The first aider should:

|                                                                                                                                                                                                      | Essential             | Important             | Don't know/Depends    | Unimportant           | Should not be included |
|------------------------------------------------------------------------------------------------------------------------------------------------------------------------------------------------------|-----------------------|-----------------------|-----------------------|-----------------------|------------------------|
| 123. Encourage the suicidal person to discuss their reasons for dying and their reasons for living, validate that they are considering both options and emphasise that living is an option for them. | <input type="radio"/> | <input type="radio"/> | <input type="radio"/> | <input type="radio"/> | <input type="radio"/>  |

## Offering reassurance

### The first aider should:

|                                                                                                                       | Essential             | Important             | Don't know/Depends    | Unimportant           | Should not be included |
|-----------------------------------------------------------------------------------------------------------------------|-----------------------|-----------------------|-----------------------|-----------------------|------------------------|
| 129. Reassure the suicidal person that it's okay to feel the way they do.                                             | <input type="radio"/> | <input type="radio"/> | <input type="radio"/> | <input type="radio"/> | <input type="radio"/>  |
| 131. Offer hope and reassurance that their feelings are temporary, that help is available and things will get better. | <input type="radio"/> | <input type="radio"/> | <input type="radio"/> | <input type="radio"/> | <input type="radio"/>  |
| 137. Remind the suicidal person that suicidal thoughts need not be acted on.                                          | <input type="radio"/> | <input type="radio"/> | <input type="radio"/> | <input type="radio"/> | <input type="radio"/>  |

## Highlighting protective factors

### 158. The first aider should not touch (e.g. hug or hold hands with) the suicidal person without their permission.

| Essential             | Important             | Don't know/Depends    | Unimportant           | Should not be included |
|-----------------------|-----------------------|-----------------------|-----------------------|------------------------|
| <input type="radio"/> | <input type="radio"/> | <input type="radio"/> | <input type="radio"/> | <input type="radio"/>  |

## What to avoid when talking with a suicidal person

### 164. The first aider should NOT:

|                                      | Essential             | Important             | Don't know/Depends    | Unimportant           | Should not be included |
|--------------------------------------|-----------------------|-----------------------|-----------------------|-----------------------|------------------------|
| Interrupt with stories of their own. | <input type="radio"/> | <input type="radio"/> | <input type="radio"/> | <input type="radio"/> | <input type="radio"/>  |

## Section 5. No-suicide contracts & safety planning

The statements in this section are about the development of no-suicide contracts and planning to keep the suicidal

# Redevelopment of mental health first aid guidelines for suicidal thoughts

person safe.

Please keep in mind that a **Safety plan** is an agreement between the suicidal person and the first aider that involves actions to keep the suicidal person safe.

Please rate how important (from *essential* to *should not be included*) you think it is that each statement be included in the final guidelines.

## Developing a safety plan

### 169. The first aider should engage the suicidal person to the fullest extent possible in decisions about a safety plan.

| Essential             | Important             | Don't know/Depends    | Unimportant           | Should not be included |
|-----------------------|-----------------------|-----------------------|-----------------------|------------------------|
| <input type="radio"/> | <input type="radio"/> | <input type="radio"/> | <input type="radio"/> | <input type="radio"/>  |

What the plan should include

### The safety plan should:

|                                                                                                    | Essential             | Important             | Don't know/Depends    | Unimportant           | Should not be included |
|----------------------------------------------------------------------------------------------------|-----------------------|-----------------------|-----------------------|-----------------------|------------------------|
| 174. Be clear, outlining what will be done, who will be doing it, and when it will be carried out. | <input type="radio"/> | <input type="radio"/> | <input type="radio"/> | <input type="radio"/> | <input type="radio"/>  |
| 175. Focus more on what the suicidal person should do rather than what they should not do.         | <input type="radio"/> | <input type="radio"/> | <input type="radio"/> | <input type="radio"/> | <input type="radio"/>  |

## Timeframe of the safety plan

### The safety plan should:

|                                                                                                                                                                           | Essential             | Important             | Don't know/Depends    | Unimportant           | Should not be included |
|---------------------------------------------------------------------------------------------------------------------------------------------------------------------------|-----------------------|-----------------------|-----------------------|-----------------------|------------------------|
| 184. Be for a length of time which will be easy for the suicidal person to cope with, so that they can feel able to fulfil the agreement and have a sense of achievement. | <input type="radio"/> | <input type="radio"/> | <input type="radio"/> | <input type="radio"/> | <input type="radio"/>  |

## Section 6. Ensuring safety

The statements in this section contain actions the first aider can take to help ensure the safety of the suicidal person.

Please rate how important (from *essential* to *should not be included*) you think it is that each statement be included in the final guidelines.

### 195. The first aider should try to remove the means of suicide available to the suicidal person if it is safe to do so.

| Essential             | Important             | Don't know/Depends    | Unimportant           | Should not be included |
|-----------------------|-----------------------|-----------------------|-----------------------|------------------------|
| <input type="radio"/> | <input type="radio"/> | <input type="radio"/> | <input type="radio"/> | <input type="radio"/>  |

# Redevelopment of mental health first aid guidelines for suicidal thoughts

**\*195.1. The first aider should try to remove the person from the means of suicide e.g. if the suicidal person is at home alone with the means for suicide, the first aider should take them somewhere safe.**

| Essential             | Important             | Don't know/Depends    | Unimportant           | Should not be included |
|-----------------------|-----------------------|-----------------------|-----------------------|------------------------|
| <input type="radio"/> | <input type="radio"/> | <input type="radio"/> | <input type="radio"/> | <input type="radio"/>  |

## Section 7. Passing time during a crisis

The statements in this section are about what the first aider should do with the suicidal person during the suicide crisis period.

Please rate how important (from *essential* to *should not be included*) you think it is that each statement be included in the final guidelines.

**The first aider should:**

|                                                                                                | Essential             | Important             | Don't know/Depends    | Unimportant           | Should not be included |
|------------------------------------------------------------------------------------------------|-----------------------|-----------------------|-----------------------|-----------------------|------------------------|
| *202.1. Stay with the suicidal person and keep them company.                                   | <input type="radio"/> | <input type="radio"/> | <input type="radio"/> | <input type="radio"/> | <input type="radio"/>  |
| *202.2. Discuss with the person what might be helpful for them to pass time during the crisis. | <input type="radio"/> | <input type="radio"/> | <input type="radio"/> | <input type="radio"/> | <input type="radio"/>  |

## Section 8. What the first aider should know

The statements in this section are about the knowledge the first aider should have to enable them to provide mental health first aid to the suicidal person.

Please rate how important (from *essential* to *should not be included*) you think it is that each statement be included in the final guidelines.

**The first aider should be aware:**

|                                                                                                                                                              | Essential             | Important             | Don't know/Depends    | Unimportant           | Should not be included |
|--------------------------------------------------------------------------------------------------------------------------------------------------------------|-----------------------|-----------------------|-----------------------|-----------------------|------------------------|
| 213. Of how commonly suicide occurs.                                                                                                                         | <input type="radio"/> | <input type="radio"/> | <input type="radio"/> | <input type="radio"/> | <input type="radio"/>  |
| 214. That there are many more suicide attempts than suicides.                                                                                                | <input type="radio"/> | <input type="radio"/> | <input type="radio"/> | <input type="radio"/> | <input type="radio"/>  |
| *214.1. That many people who are suicidal act impulsively and that the first aider's role is to slow down their thinking and help them feel more in control. | <input type="radio"/> | <input type="radio"/> | <input type="radio"/> | <input type="radio"/> | <input type="radio"/>  |
| *217.1. That it is more important to be genuinely caring than to say 'all the right things'.                                                                 | <input type="radio"/> | <input type="radio"/> | <input type="radio"/> | <input type="radio"/> | <input type="radio"/>  |
| 220. That suicidal people believe they have no choice but to die by suicide.                                                                                 | <input type="radio"/> | <input type="radio"/> | <input type="radio"/> | <input type="radio"/> | <input type="radio"/>  |
| 222. That suicidal thoughts are temporary.                                                                                                                   | <input type="radio"/> | <input type="radio"/> | <input type="radio"/> | <input type="radio"/> | <input type="radio"/>  |
| 229. That unless someone tells you, the only way to know if a person is thinking of suicide is to ask.                                                       | <input type="radio"/> | <input type="radio"/> | <input type="radio"/> | <input type="radio"/> | <input type="radio"/>  |

## Section 9. Confidentiality

# Redevelopment of mental health first aid guidelines for suicidal thoughts

The statements in this section are about the confidentiality of the suicidal person's thoughts and behaviours.

Please rate how important (from *essential* to *should not be included*) you think it is that each statement be included in the final guidelines.

**235. If the suicidal person doesn't want the first aider to tell anyone about their suicidal thoughts, the first aider should not agree and explain why, e.g. "I care about you too much to keep a secret like this. You need help and I am here to help you get it".**

| Essential             | Important             | Don't know/Depends    | Unimportant           | Should not be included |
|-----------------------|-----------------------|-----------------------|-----------------------|------------------------|
| <input type="radio"/> | <input type="radio"/> | <input type="radio"/> | <input type="radio"/> | <input type="radio"/>  |

**\*235.1. If the first aider needs to breach confidentiality to ensure the person's safety, they should be transparent and tell the person who they will be notifying.**

| Essential             | Important             | Don't know/Depends    | Unimportant           | Should not be included |
|-----------------------|-----------------------|-----------------------|-----------------------|------------------------|
| <input type="radio"/> | <input type="radio"/> | <input type="radio"/> | <input type="radio"/> | <input type="radio"/>  |

**\*235.2. If the first aider needs to breach confidentiality to ensure the person's safety, they should go back to the person at a later time and tell them why they did it.**

| Essential             | Important             | Don't know/Depends    | Unimportant           | Should not be included |
|-----------------------|-----------------------|-----------------------|-----------------------|------------------------|
| <input type="radio"/> | <input type="radio"/> | <input type="radio"/> | <input type="radio"/> | <input type="radio"/>  |

## Section 10. Adolescent specific

Because the support provided to young people might be quite different to the support provided to an adult, the statements in this section are to be rated for **providing mental health first aid to an adolescent**. The term **adolescent** refers to a young person aged between 12 and 18 years (nominally the high school years).

Please rate how important (from *essential* to *should not be included*) you think it is that each statement be included in the final guidelines.

### *Initial assistance*

**243. The first aider should not leave an adolescent who is feeling suicidal on their own.**

| Essential             | Important             | Don't know/Depends    | Unimportant           | Should not be included |
|-----------------------|-----------------------|-----------------------|-----------------------|------------------------|
| <input type="radio"/> | <input type="radio"/> | <input type="radio"/> | <input type="radio"/> | <input type="radio"/>  |

# Redevelopment of mental health first aid guidelines for suicidal thoughts

## \*245. If the adolescent is suicidal, the first aider should:

|                                                                         | Essential             | Important             | Don't know/Depends    | Unimportant           | Should not be included |
|-------------------------------------------------------------------------|-----------------------|-----------------------|-----------------------|-----------------------|------------------------|
| Always notify the adolescent's parents that the adolescent is suicidal. | <input type="radio"/> | <input type="radio"/> | <input type="radio"/> | <input type="radio"/> | <input type="radio"/>  |

## 246. If the suicidal adolescent can't commit to stay safe, the first aider should:

|                                                                                                    | Essential             | Important             | Don't know/Depends    | Unimportant           | Should not be included |
|----------------------------------------------------------------------------------------------------|-----------------------|-----------------------|-----------------------|-----------------------|------------------------|
| Encourage the suicidal person to get appropriate professional help as soon as possible (i.e. See a | <input type="radio"/> | <input type="radio"/> | <input type="radio"/> | <input type="radio"/> | <input type="radio"/>  |

## Section 10. Adolescent specific (2)

## 247. If the suicidal adolescent has a specific plan, the first aider should:

|                                                                                           | Essential             | Important             | Don't know/Depends    | Unimportant           | Should not be included |
|-------------------------------------------------------------------------------------------|-----------------------|-----------------------|-----------------------|-----------------------|------------------------|
| Call a mental health centre or crisis telephone line and ask for advice on the situation. | <input type="radio"/> | <input type="radio"/> | <input type="radio"/> | <input type="radio"/> | <input type="radio"/>  |

## 248. If the suicidal adolescent has the means to carry out their suicide plan, the first aider should:

|                                                                                                                                                                       | Essential             | Important             | Don't know/Depends    | Unimportant           | Should not be included |
|-----------------------------------------------------------------------------------------------------------------------------------------------------------------------|-----------------------|-----------------------|-----------------------|-----------------------|------------------------|
| Discuss with the suicidal person what actions they should take to get help.                                                                                           | <input type="radio"/> | <input type="radio"/> | <input type="radio"/> | <input type="radio"/> | <input type="radio"/>  |
| Encourage the suicidal person to get appropriate professional help as soon as possible (i.e. See a mental health professional or someone at a mental health service). | <input type="radio"/> | <input type="radio"/> | <input type="radio"/> | <input type="radio"/> | <input type="radio"/>  |
| Call a mental health centre or crisis telephone line and ask for advice on the situation.                                                                             | <input type="radio"/> | <input type="radio"/> | <input type="radio"/> | <input type="radio"/> | <input type="radio"/>  |
| member <b>without letting the suicidal person know.</b>                                                                                                               | <input type="radio"/> | <input type="radio"/> | <input type="radio"/> | <input type="radio"/> | <input type="radio"/>  |
| Take the suicidal person to a hospital emergency department.                                                                                                          | <input type="radio"/> | <input type="radio"/> | <input type="radio"/> | <input type="radio"/> | <input type="radio"/>  |

## 249. If the suicidal adolescent does not agree to give the first aider the things they intend using to kill themselves, the first aider should:

|                                                                                                                                                                       | Essential             | Important             | Don't know/Depends    | Unimportant           | Should not be included |
|-----------------------------------------------------------------------------------------------------------------------------------------------------------------------|-----------------------|-----------------------|-----------------------|-----------------------|------------------------|
| Discuss with the suicidal person what actions they should take to get help.                                                                                           | <input type="radio"/> | <input type="radio"/> | <input type="radio"/> | <input type="radio"/> | <input type="radio"/>  |
| Encourage the suicidal person to get appropriate professional help as soon as possible (i.e. See a mental health professional or someone at a mental health service). | <input type="radio"/> | <input type="radio"/> | <input type="radio"/> | <input type="radio"/> | <input type="radio"/>  |

# Redevelopment of mental health first aid guidelines for suicidal thoughts

## 249. If the suicidal adolescent has attempted suicide in the past, the first aider should:

|                                                                                                                                                                       | Essential             | Important             | Don't know/Depends    | Unimportant           | Should not be included |
|-----------------------------------------------------------------------------------------------------------------------------------------------------------------------|-----------------------|-----------------------|-----------------------|-----------------------|------------------------|
| Discuss with the suicidal person what actions they should take to get help.                                                                                           | <input type="radio"/> | <input type="radio"/> | <input type="radio"/> | <input type="radio"/> | <input type="radio"/>  |
| Encourage the suicidal person to get appropriate professional help as soon as possible (i.e. See a mental health professional or someone at a mental health service). | <input type="radio"/> | <input type="radio"/> | <input type="radio"/> | <input type="radio"/> | <input type="radio"/>  |

## 251. If the suicidal adolescent is known to have a diagnosis of a mental illness, the first aider should:

|                                                                                                                                | Essential             | Important             | Don't know/Depends    | Unimportant           | Should not be included |
|--------------------------------------------------------------------------------------------------------------------------------|-----------------------|-----------------------|-----------------------|-----------------------|------------------------|
| Seek the permission of the suicidal person to contact their regular doctor or mental health professional about their concerns. | <input type="radio"/> | <input type="radio"/> | <input type="radio"/> | <input type="radio"/> | <input type="radio"/>  |

## 253. If the suicidal adolescent refuses professional help, the first aider should:

|                                                                                           | Essential             | Important             | Don't know/Depends    | Unimportant           | Should not be included |
|-------------------------------------------------------------------------------------------|-----------------------|-----------------------|-----------------------|-----------------------|------------------------|
| Call a mental health centre or crisis telephone line and ask for advice on the situation. | <input type="radio"/> | <input type="radio"/> | <input type="radio"/> | <input type="radio"/> | <input type="radio"/>  |

## 254. If the suicidal adolescent is reluctant to seek help, the first aider should:

|                                                                        | Essential             | Important             | Don't know/Depends    | Unimportant           | Should not be included |
|------------------------------------------------------------------------|-----------------------|-----------------------|-----------------------|-----------------------|------------------------|
| Keep encouraging them to see a mental health professional.             | <input type="radio"/> | <input type="radio"/> | <input type="radio"/> | <input type="radio"/> | <input type="radio"/>  |
| Contact a suicide prevention hotline for guidance on how to help them. | <input type="radio"/> | <input type="radio"/> | <input type="radio"/> | <input type="radio"/> | <input type="radio"/>  |

## 256. The first aider should ensure that the suicidal adolescent receives help from a health professional, support group or relevant community organisation.

| Essential             | Important             | Don't know/Depends    | Unimportant           | Should not be included |
|-----------------------|-----------------------|-----------------------|-----------------------|------------------------|
| <input type="radio"/> | <input type="radio"/> | <input type="radio"/> | <input type="radio"/> | <input type="radio"/>  |

## 259. The first aider should not try to take on the suicidal adolescent's responsibilities.

| Essential             | Important             | Don't know/Depends    | Unimportant           | Should not be included |
|-----------------------|-----------------------|-----------------------|-----------------------|------------------------|
| <input type="radio"/> | <input type="radio"/> | <input type="radio"/> | <input type="radio"/> | <input type="radio"/>  |

## Round 2 survey complete!

That is the end of the second round survey! Thank you very much for your contribution.



## Redevelopment of mental health first aid guidelines for suicidal thoughts

By pressing the **"done" button** your final responses will be registered with our survey software. Once all panel members have lodged their responses, we will collate the data and send you a report on the findings.

Remember, if the statements presented have caused you to **feel sad or distressed in any way**, please do not hesitate to talk to someone about it. We recommend calling one of the helplines listed below:

### **Calling from Australia**

beyond blue: 1300 22 4636 (24hrs)

LifeLine: 13 11 14 (24hrs, free call from mobile phone)

### **Calling from the USA**

National Suicide Prevention Lifeline: 1800 273 8255 (24hrs, toll free)

National Hopeline Network: 1800 442 4673 (24hrs)

### **Calling from Canada**

The support network: 780 482 4357 (24hrs)

Crisis Line: 1866 996 0991 (24hrs, toll free)

Salvation Army Suicide Prevention crisis line: 905 522 1477 (24hrs)

### **Calling from New Zealand**

Lifeline: 0800 543 354 (24hrs, toll free)

Samaritans: 0800 726 666 (24hrs, toll free)

### **Calling from the UK**

Samaritans: 08457 90 90 90 (24hrs)

SANeline: 0845 767 8000 (6pm-11pm)

Thank you once again. We are extremely grateful for your contribution.

The Research Team
